# Supplementary material for: Diosmin ameliorates renal fibrosis through inhibition of inflammation by regulating SIRT3-mediated NF-κB p65 nuclear translocation
Source: Springer Nature journal article supplement (doi:10.1186/s12906-023-04330-z), 2024-01-09

**Fig.2B**

GAPDH-①

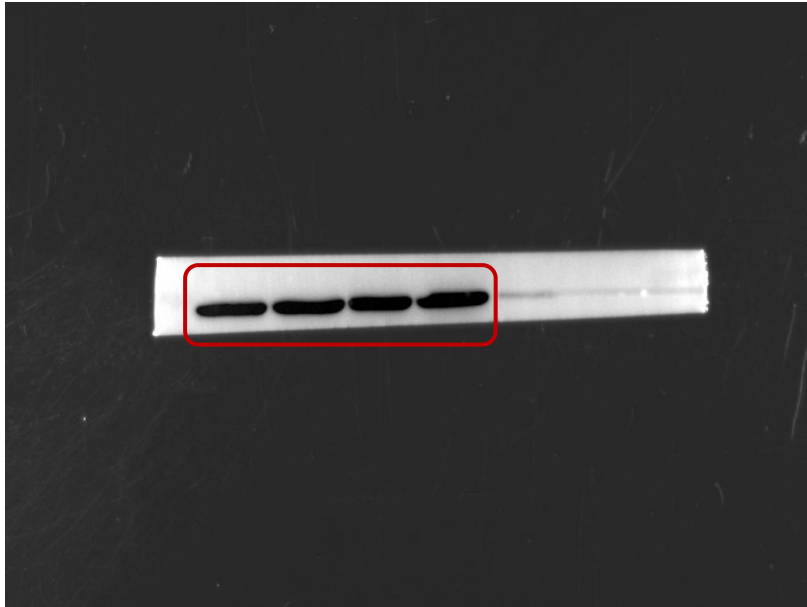

GAPDH-②

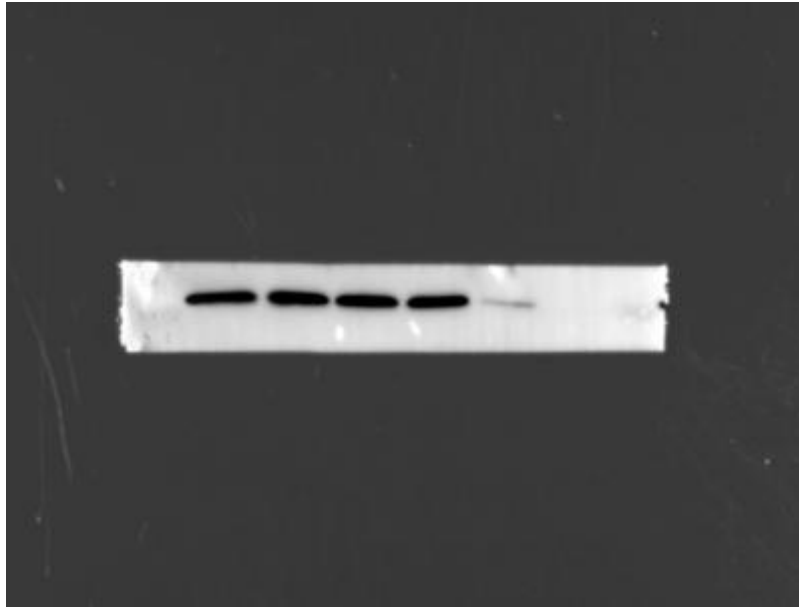

GAPDH-③

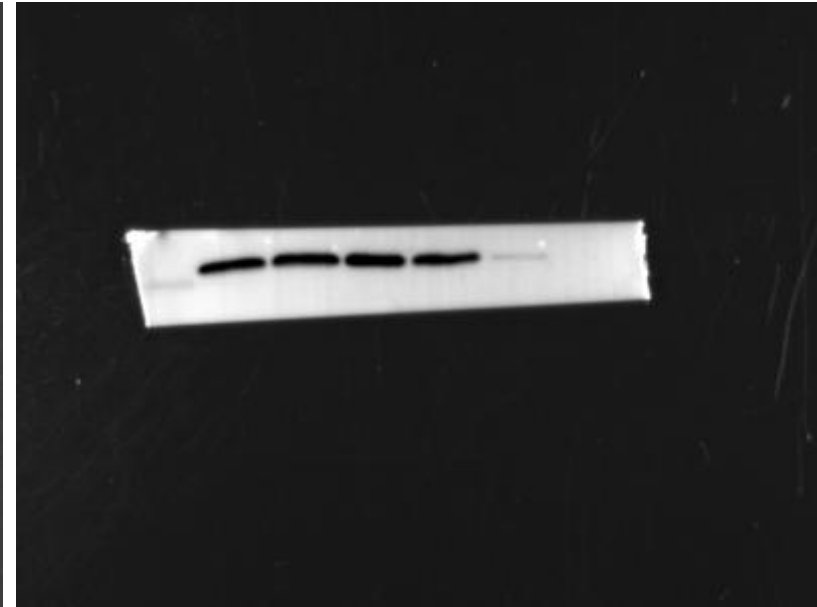

\*Part of the the blots were cut prior to hybridisation with antibodies during blotting.

Fig.2B

Collagen1-①

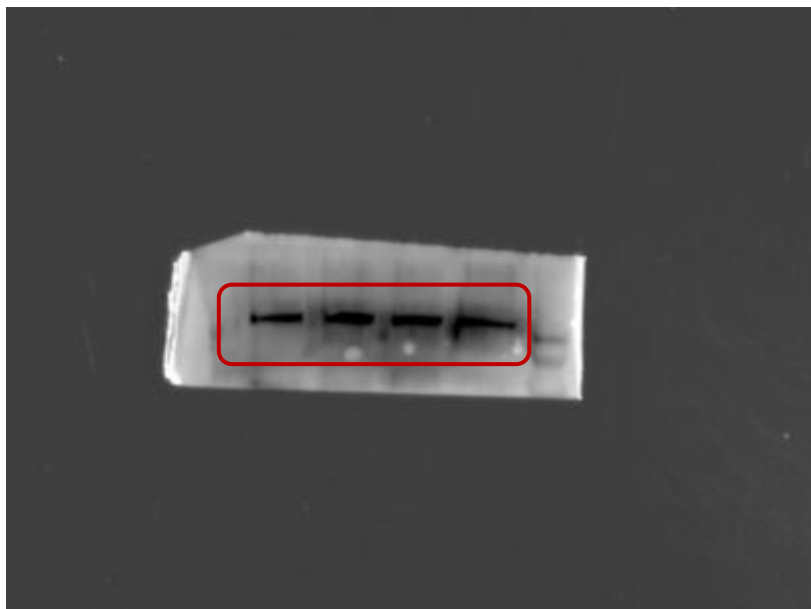

Collagen1-②

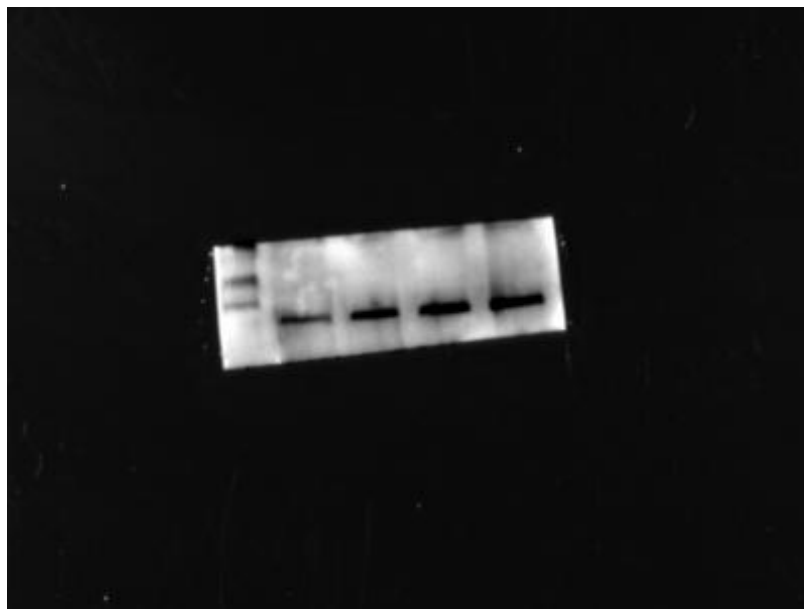

Collagen1-③

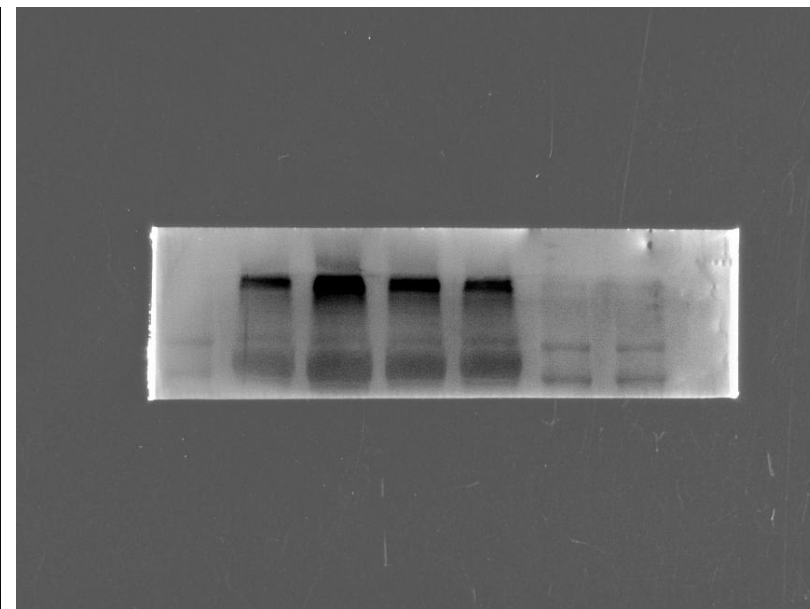

Fig.2B

$\alpha$ -SMA-①

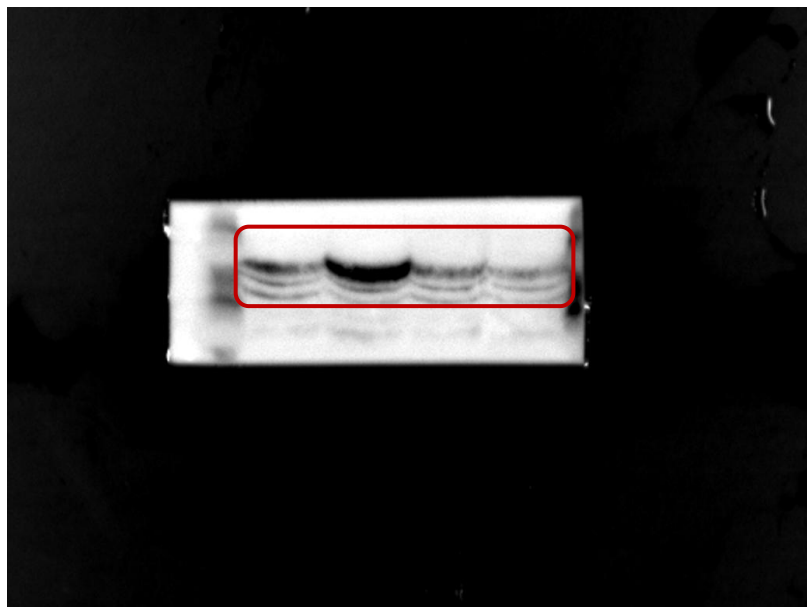

$\alpha$ -SMA-②

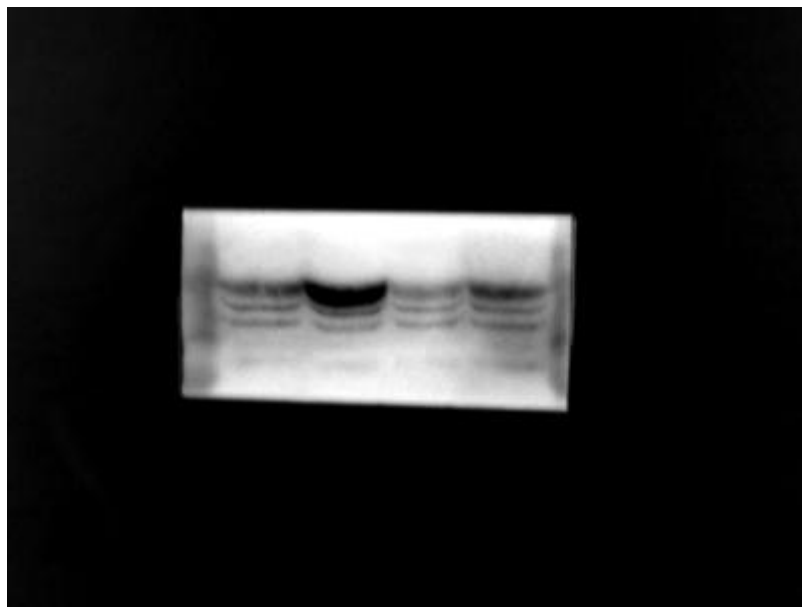

$\alpha$ -SMA-③

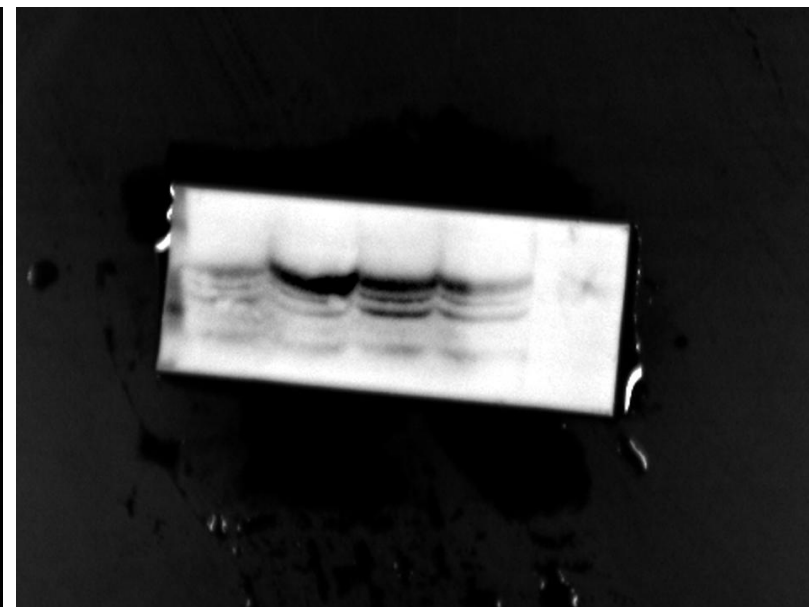

Fig.3D

GAPDH-①

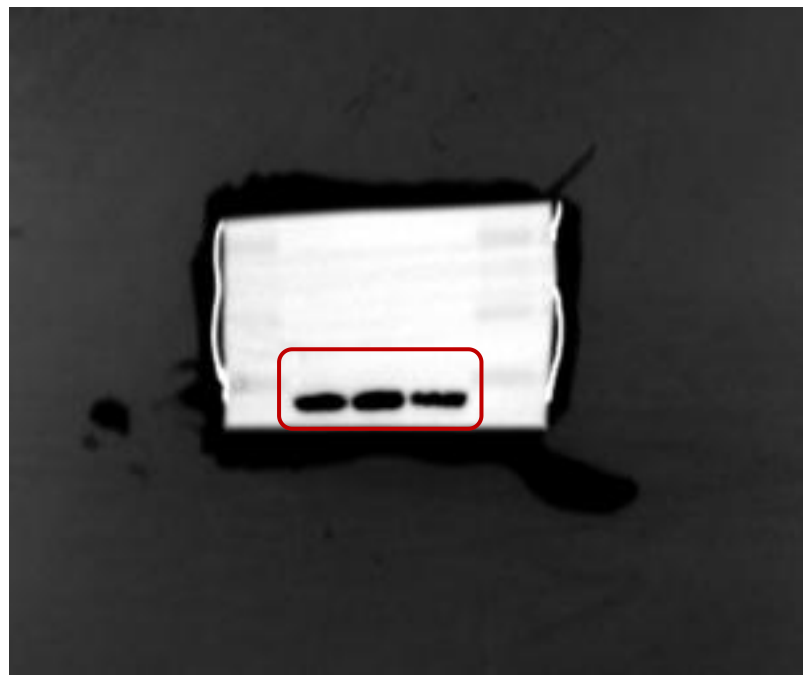

GAPDH-②

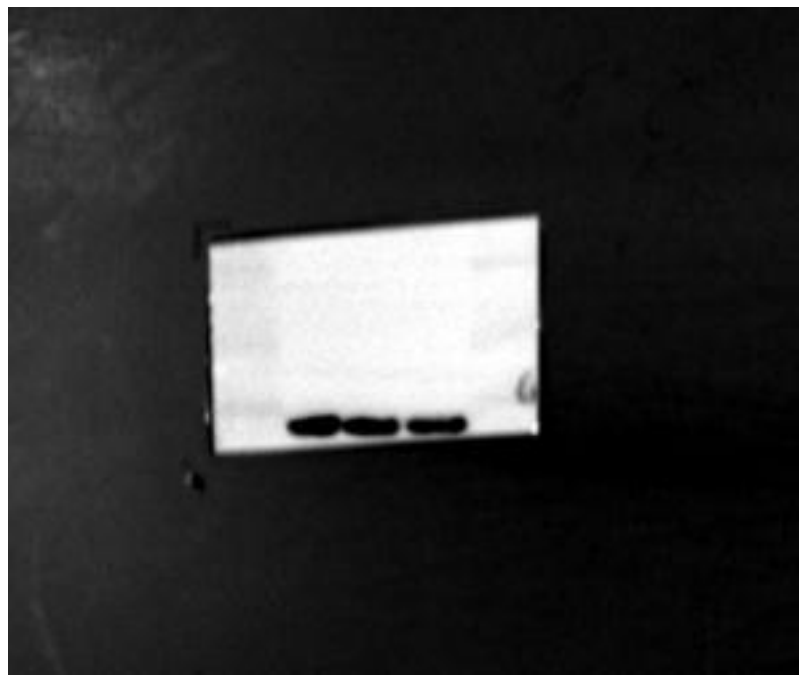

GAPDH-③

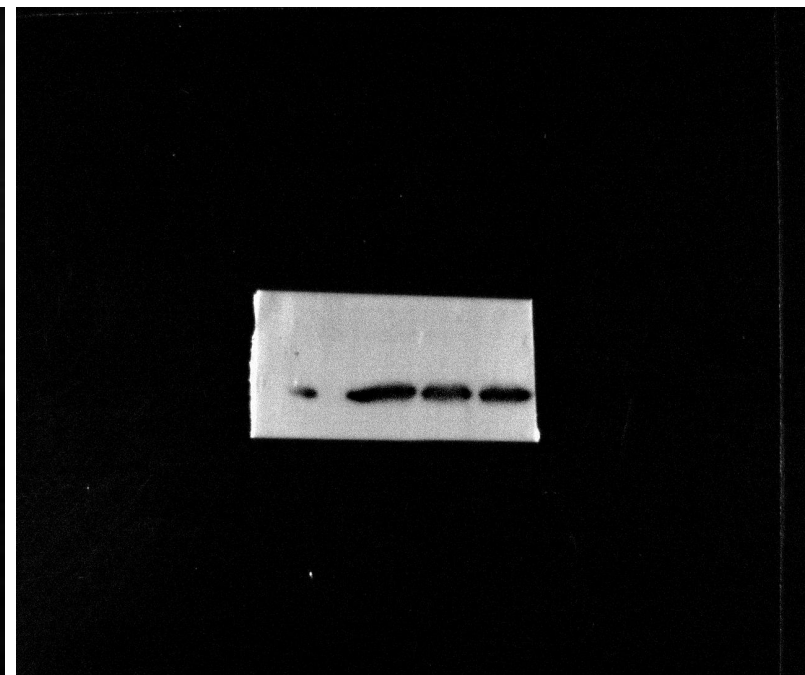

Fig.3D

Collagen1-①

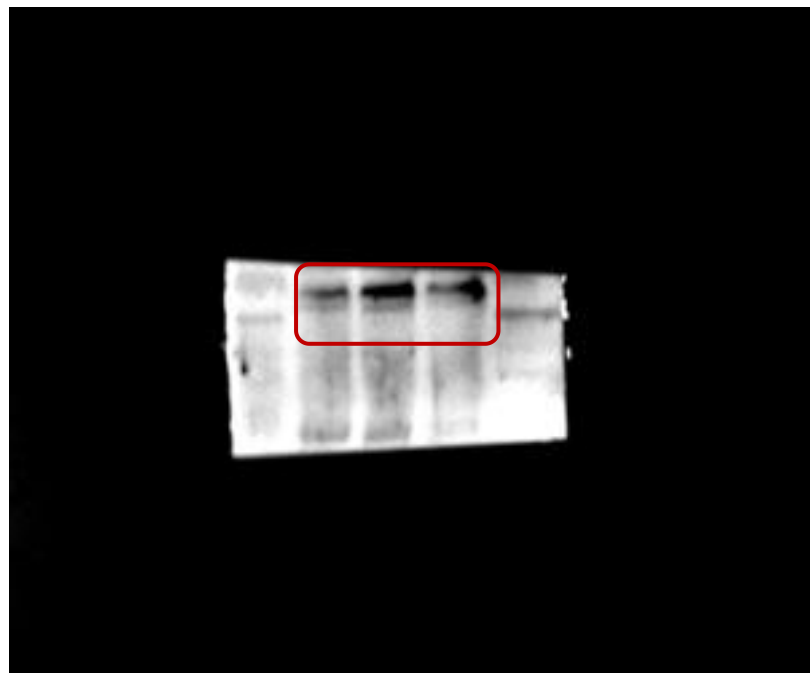

Collagen1-②

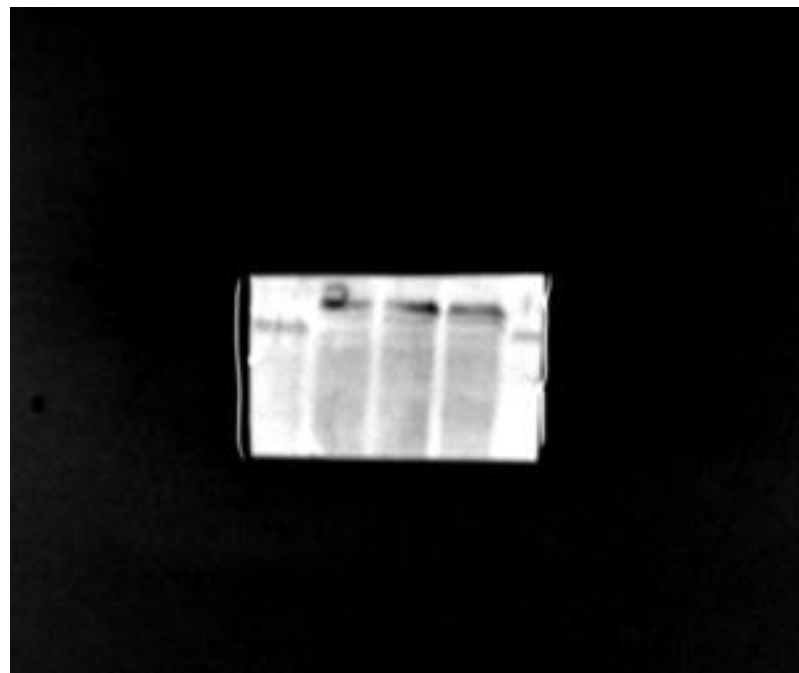

Collagen1-③

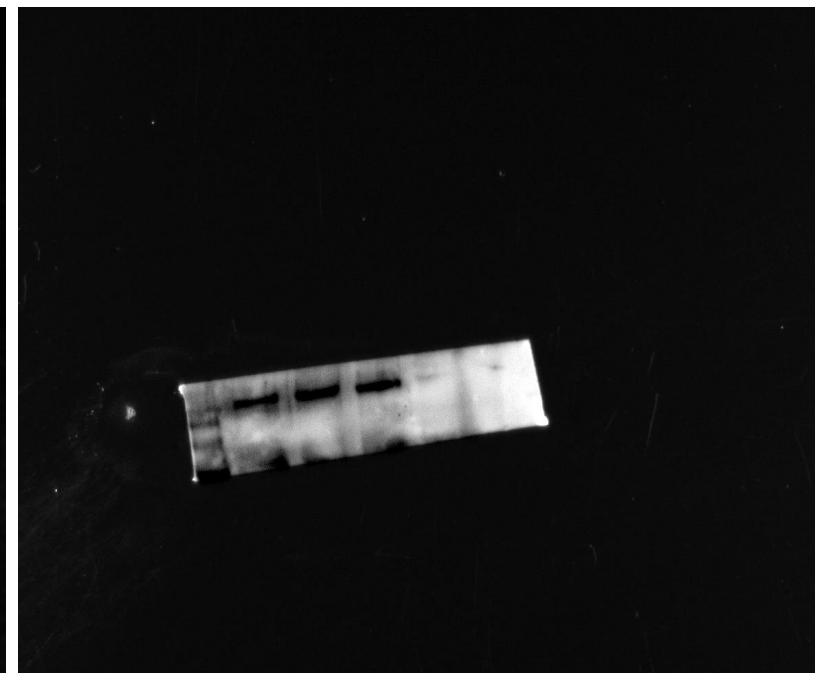

Fig.3D

$\alpha$ -SMA-①

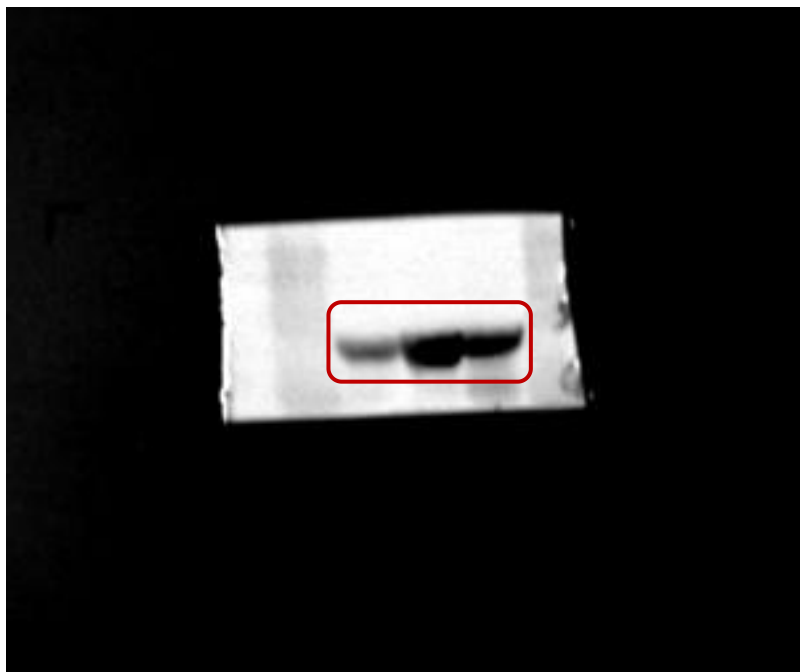

$\alpha$ -SMA-②

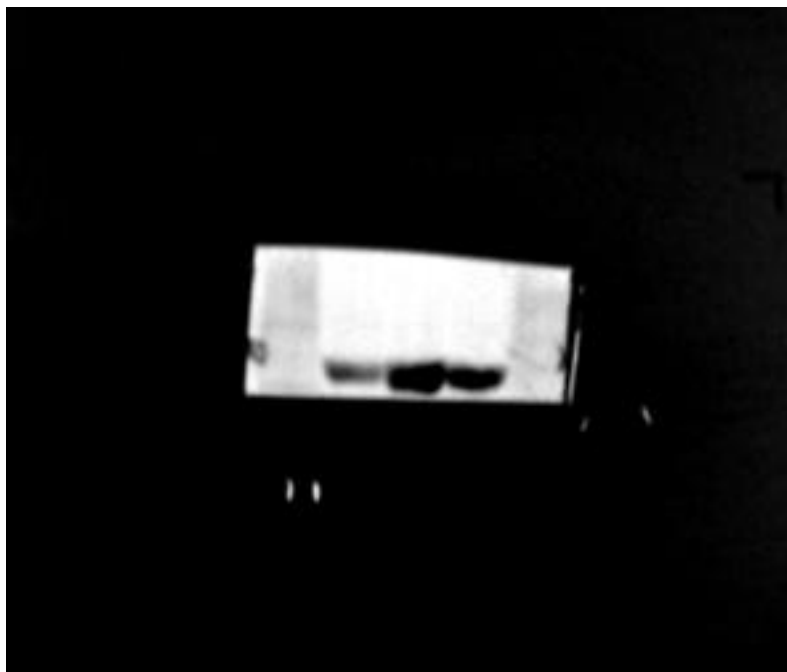

$\alpha$ -SMA-③

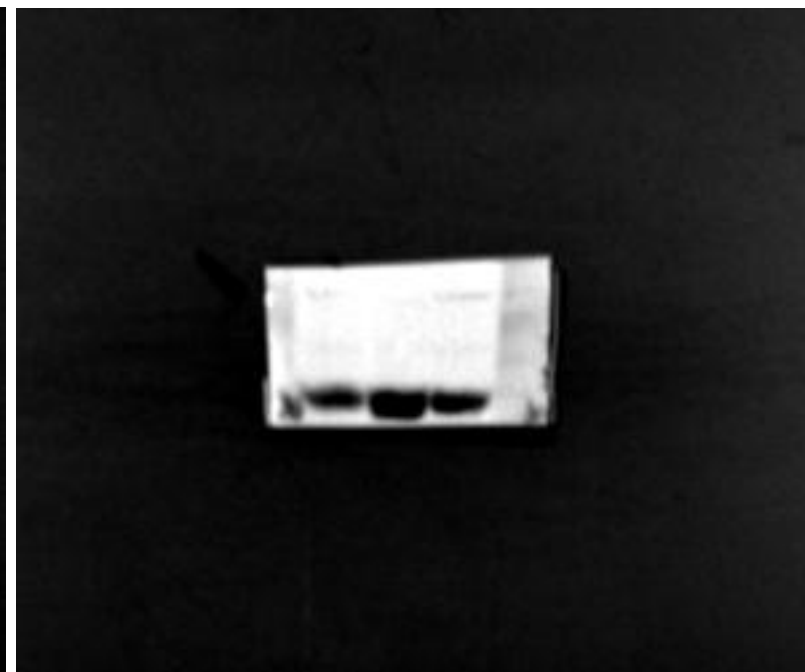

Fig.4E

GAPDH-①

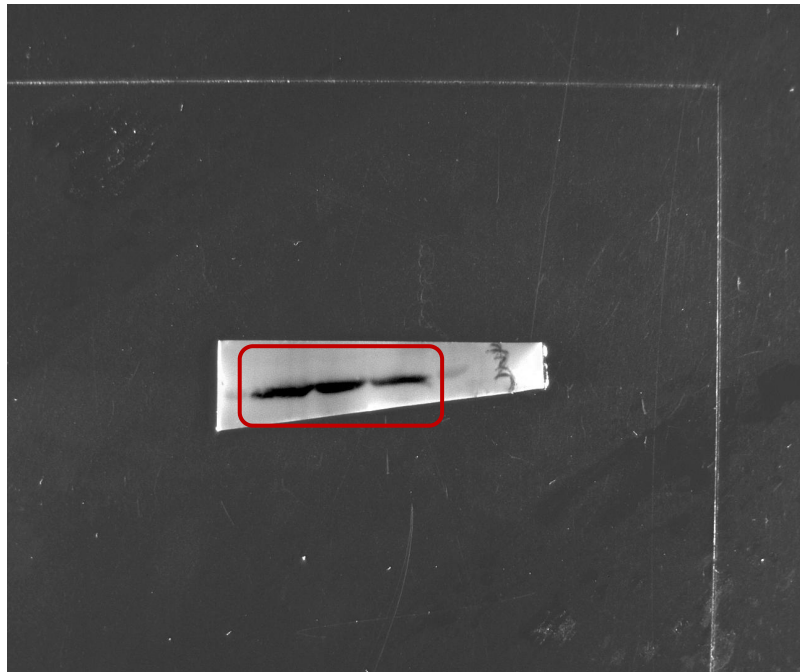

GAPDH-②

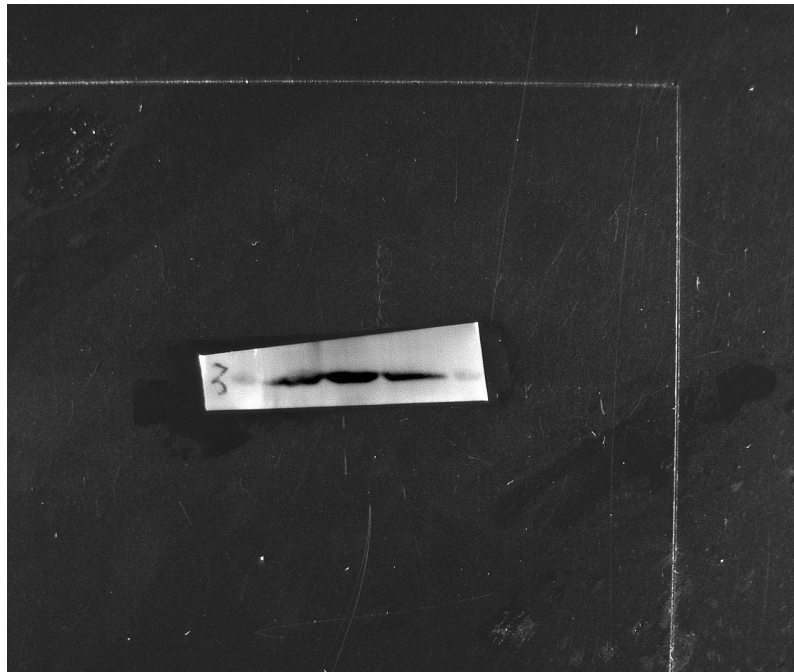

GAPDH-③

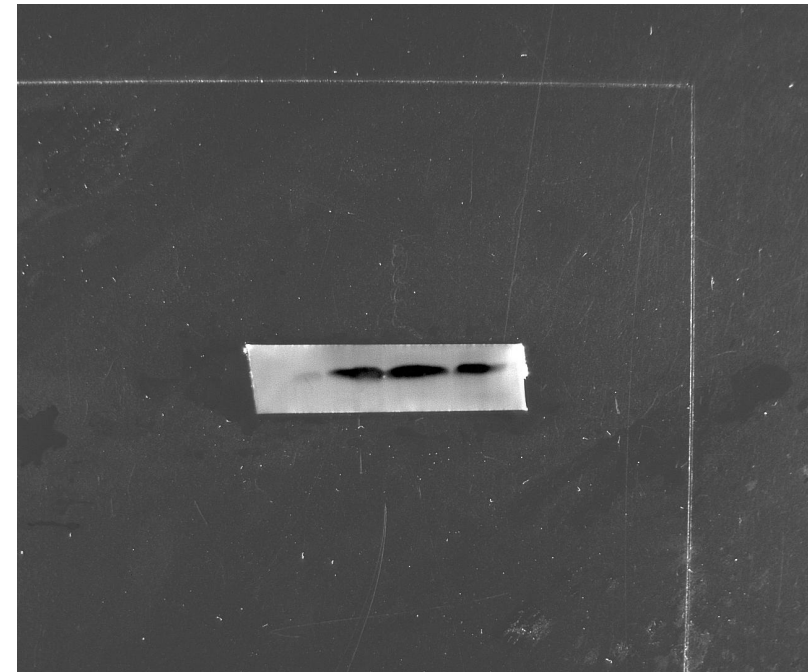

Fig.4E

SIRT3-①

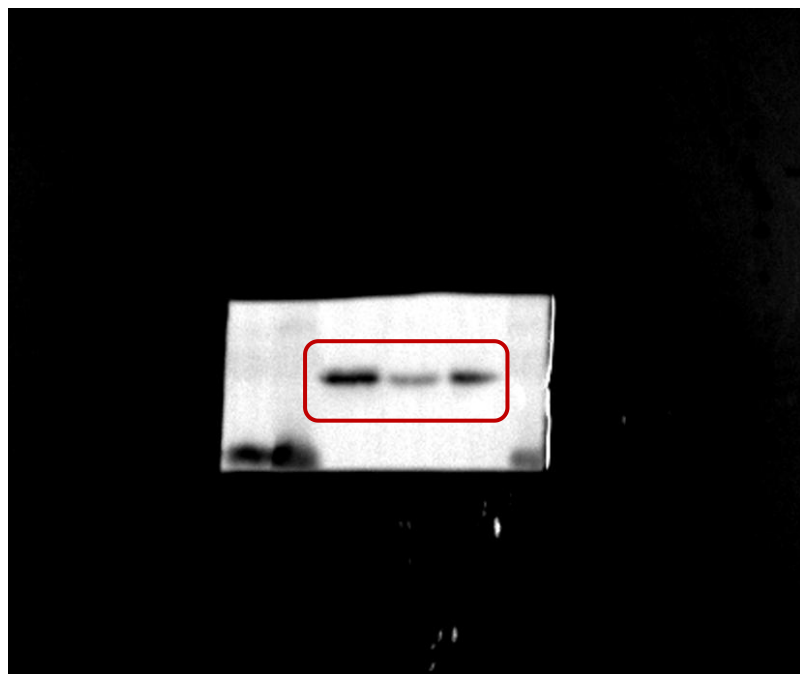

SIRT3-②

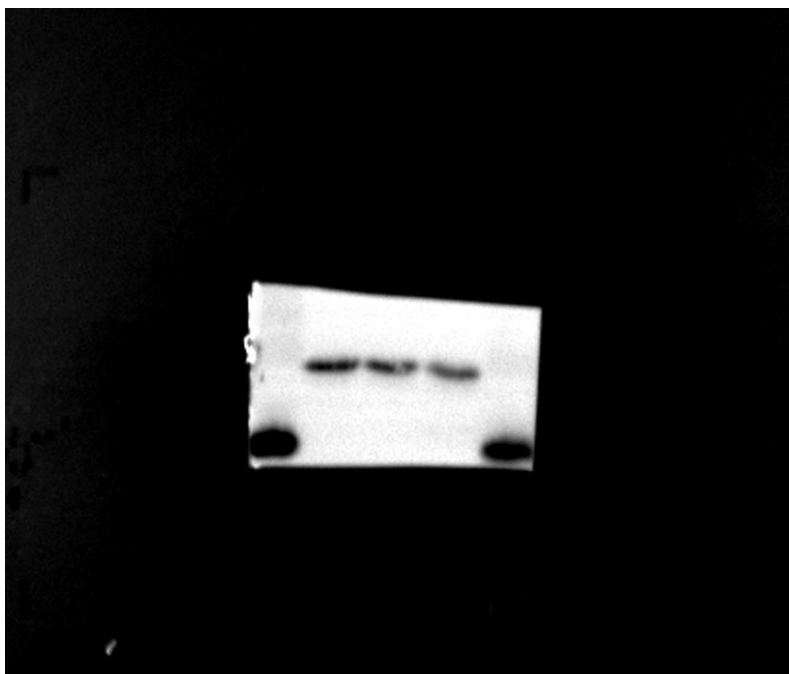

SIRT3-③

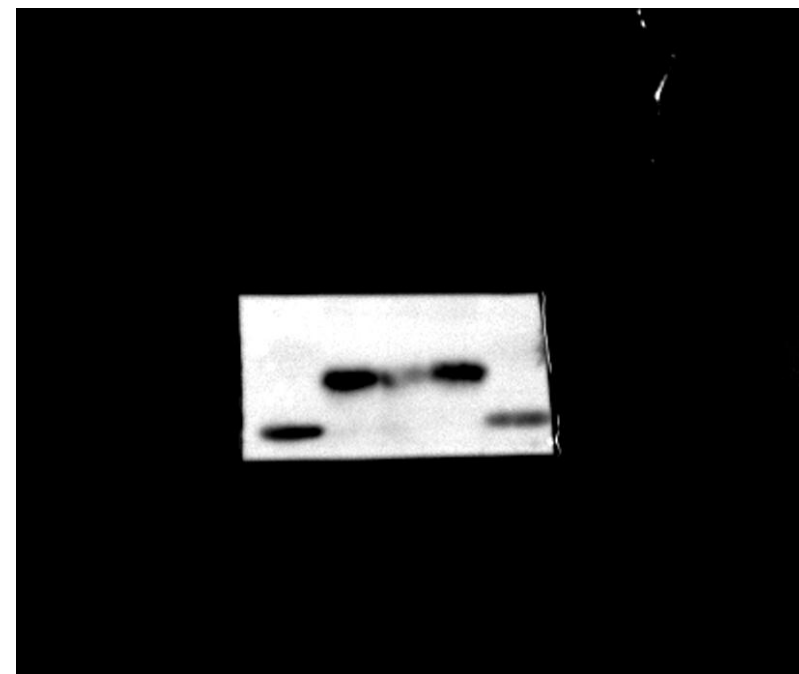



**Fig.5A**

GAPDH-①

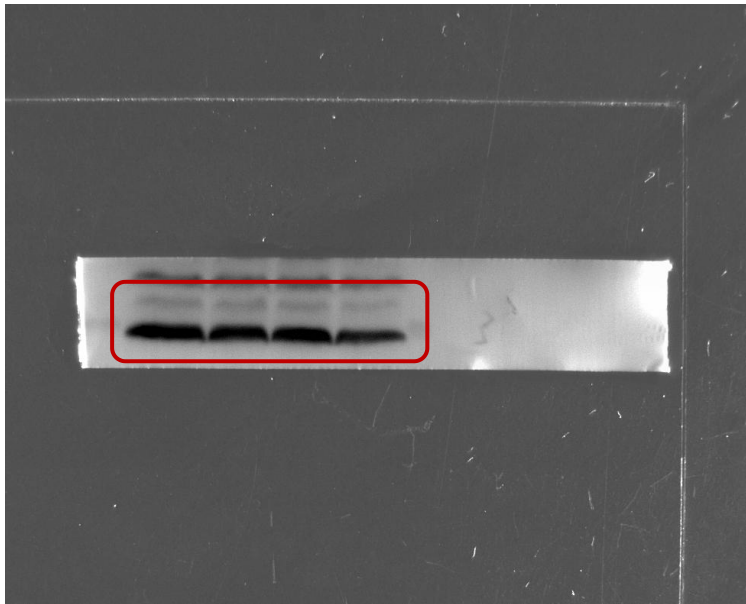

GAPDH-②

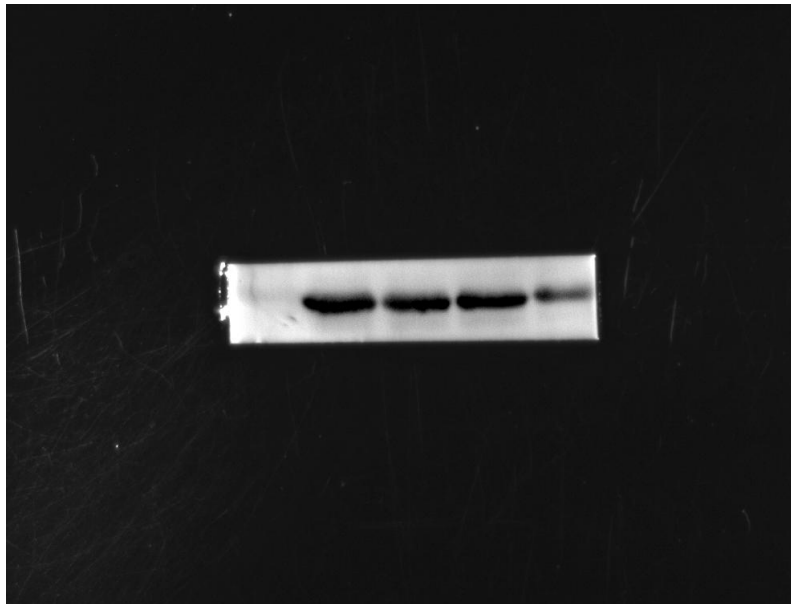

GAPDH-③

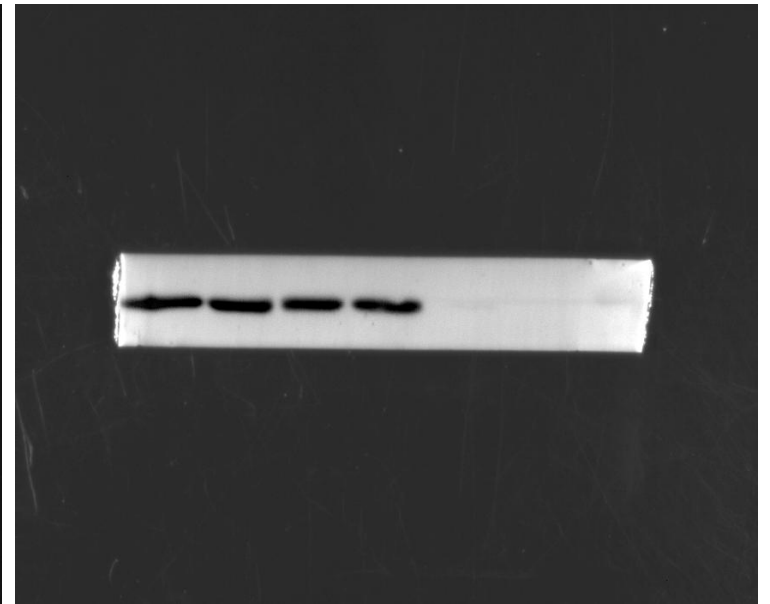

Fig.5A

SIRT3-①

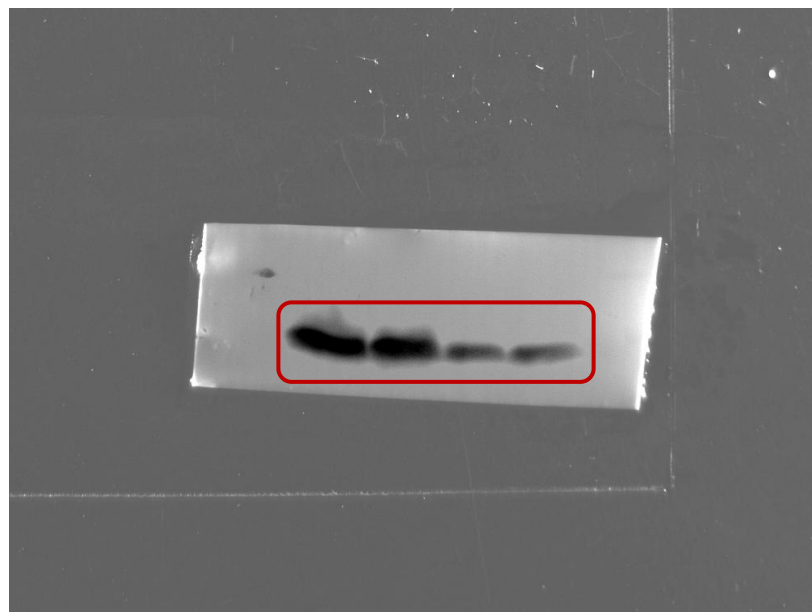

SIRT3-②

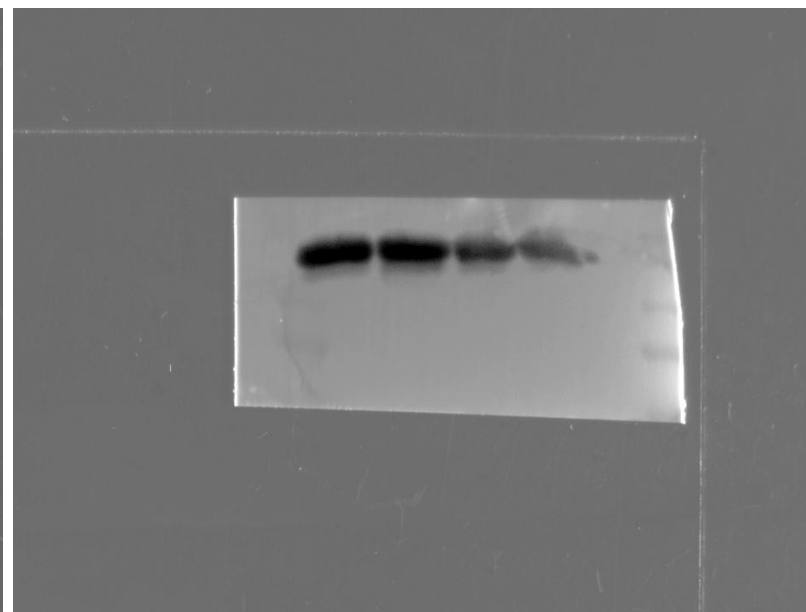

SIRT3-③

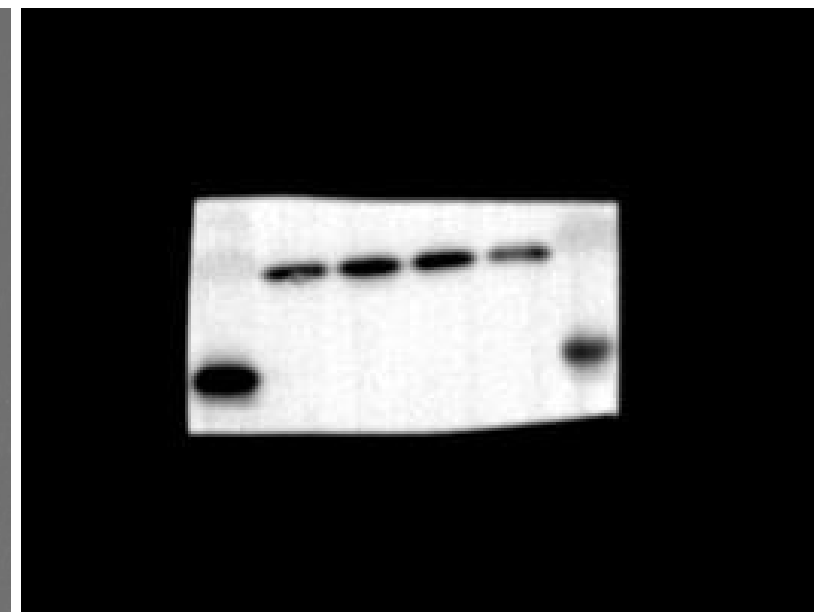

**Fig.6B**

t-NF- $\kappa$ B p65-①

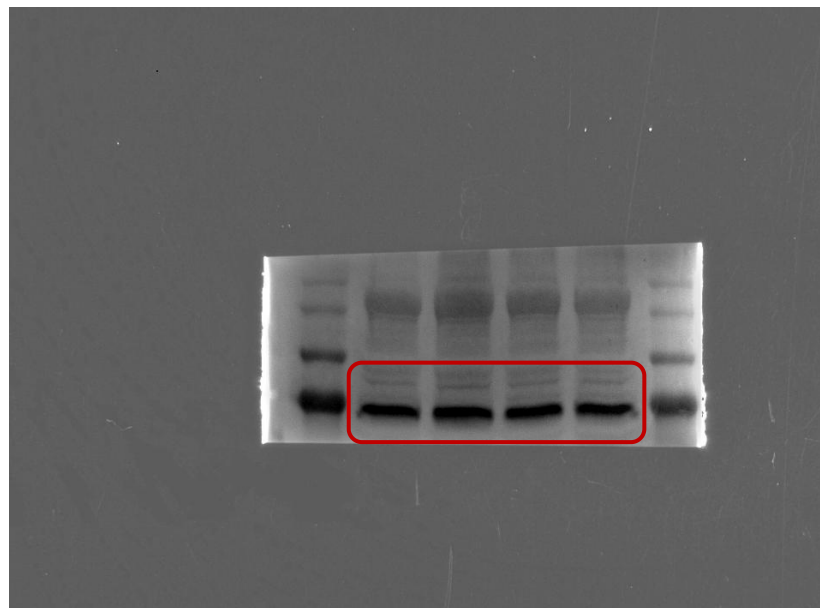

t-NF- $\kappa$ B p65-②

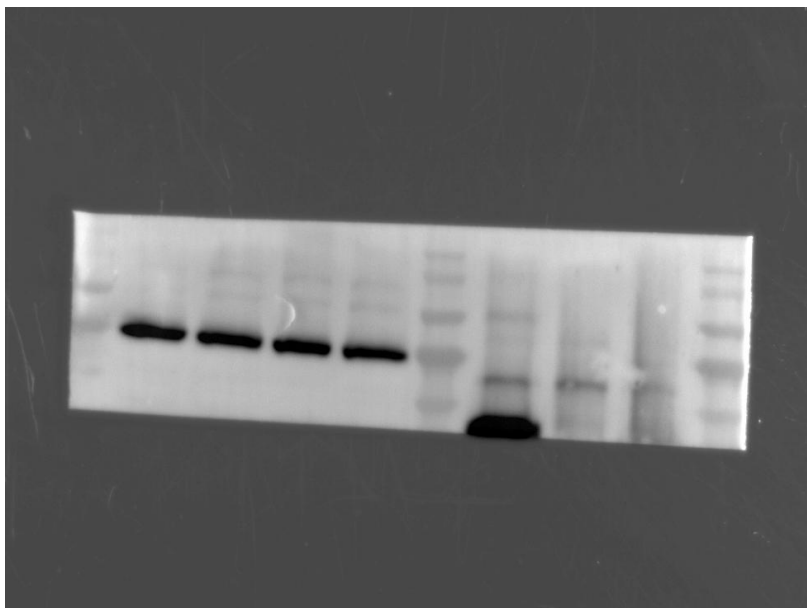

t-NF- $\kappa$ B p65-③

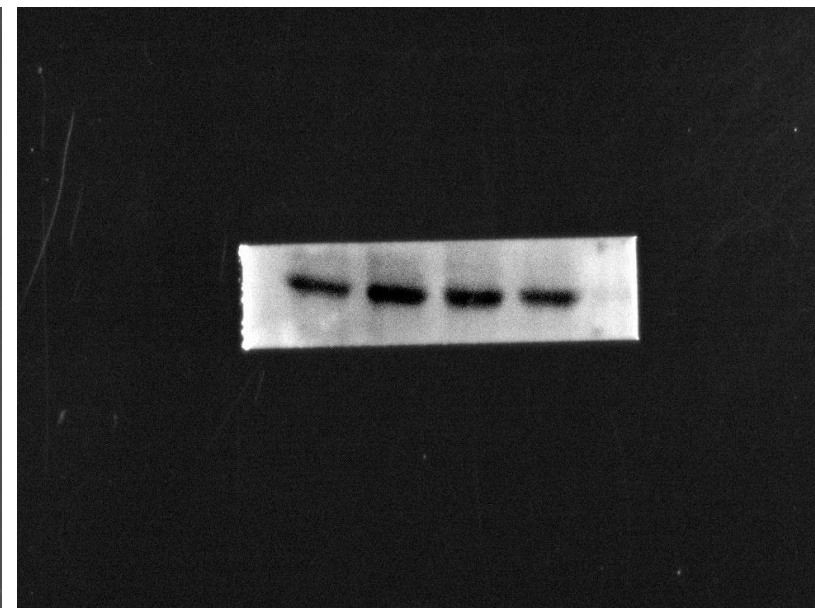

**Fig.6B**

GAPDH-①

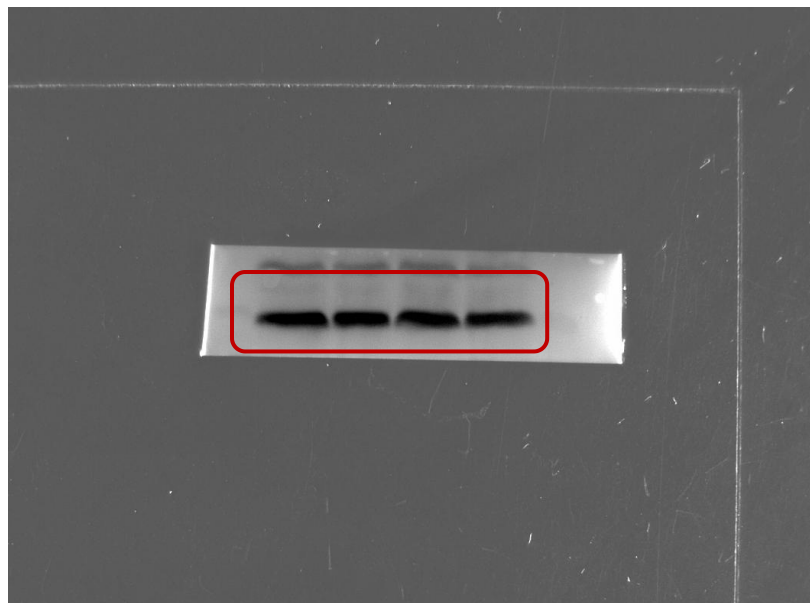

GAPDH-②

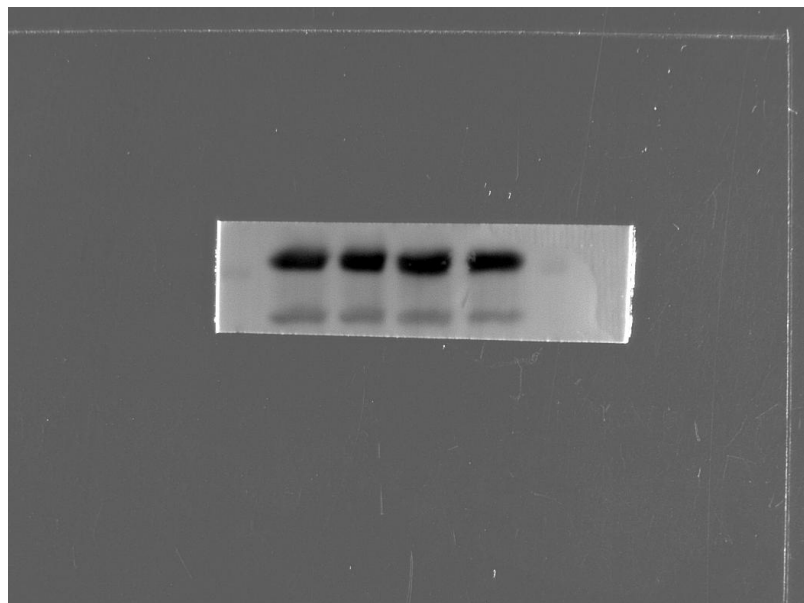

GAPDH-③

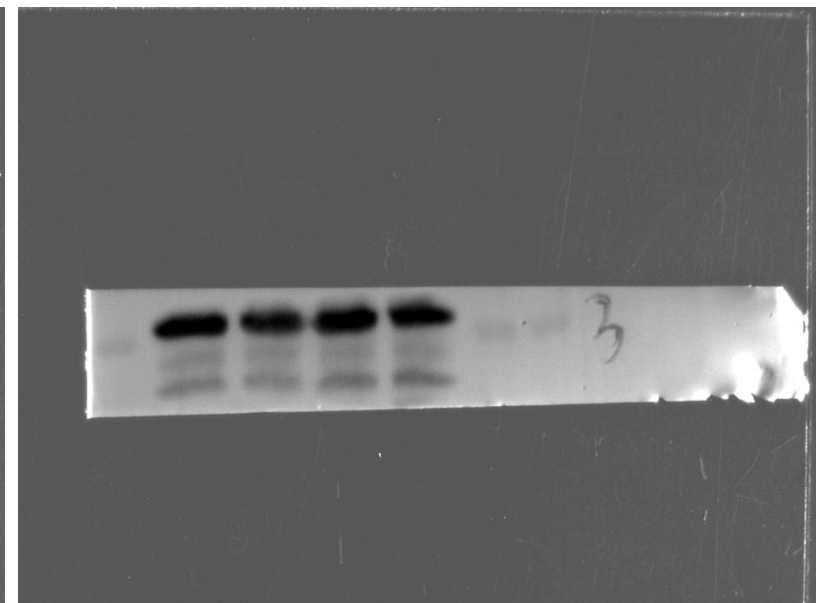

**Fig.6B**

NF- $\kappa$ B p65-①

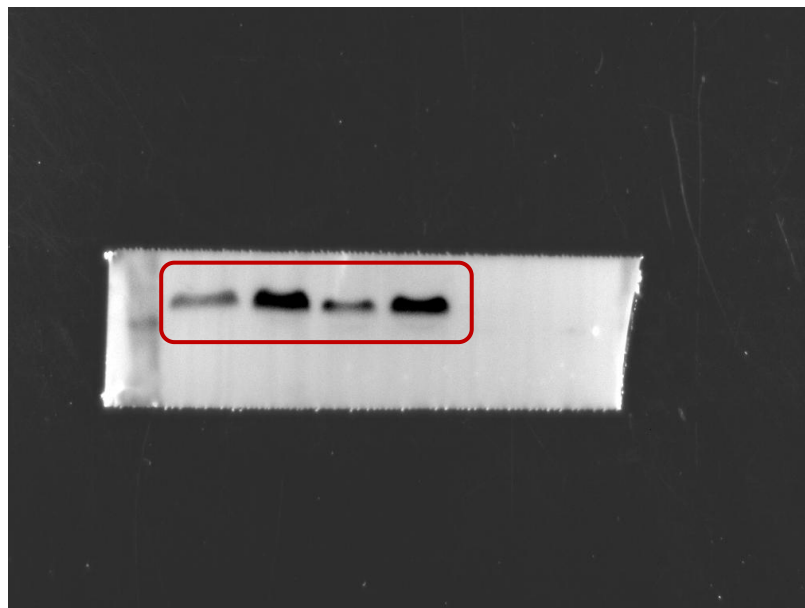

NF- $\kappa$ B p65-②

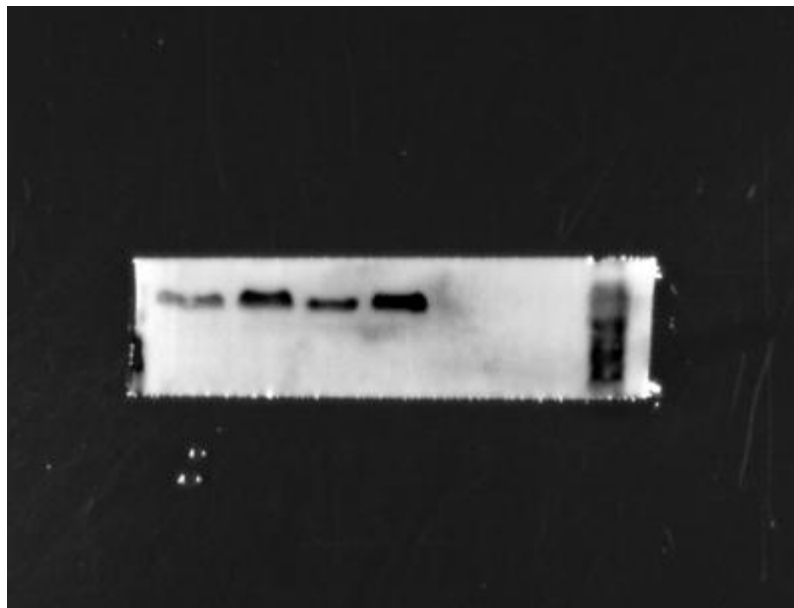

NF- $\kappa$ B p65-③

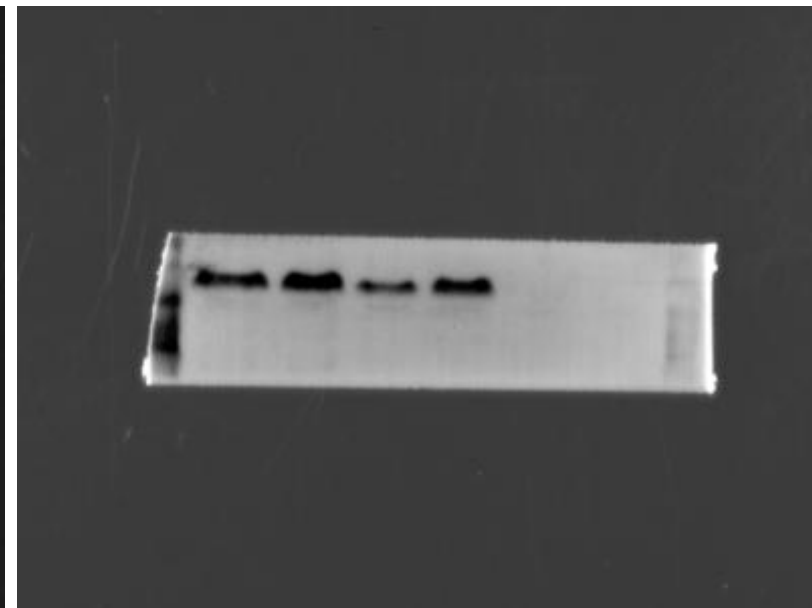

**Fig.6B**

Lamin B1-①

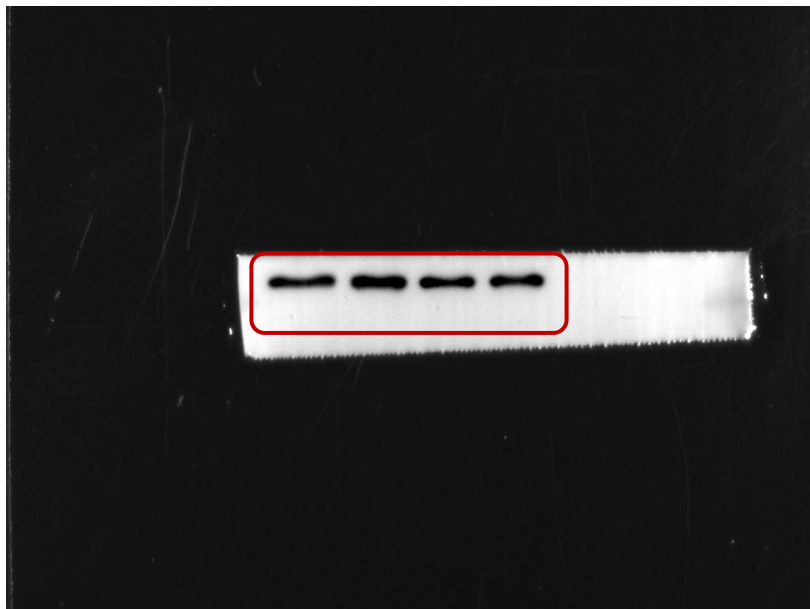

Lamin B1-②

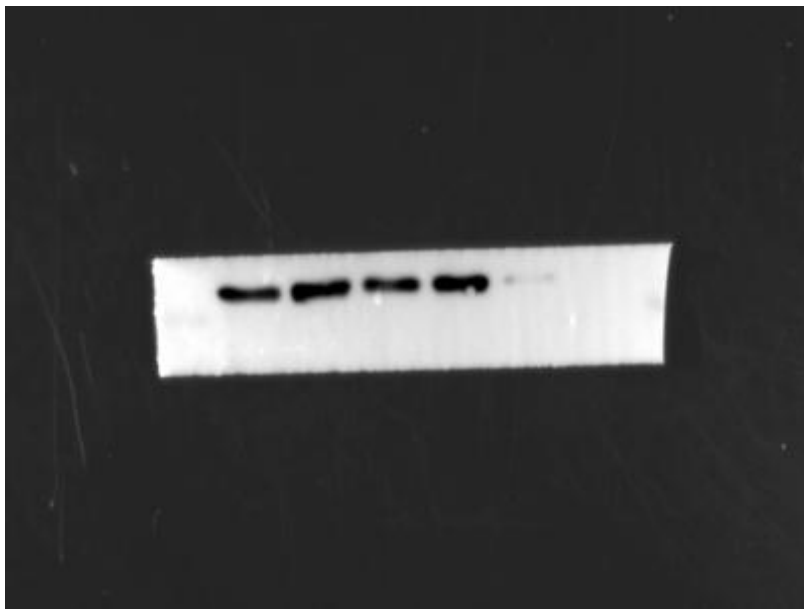

Lamin B1-③

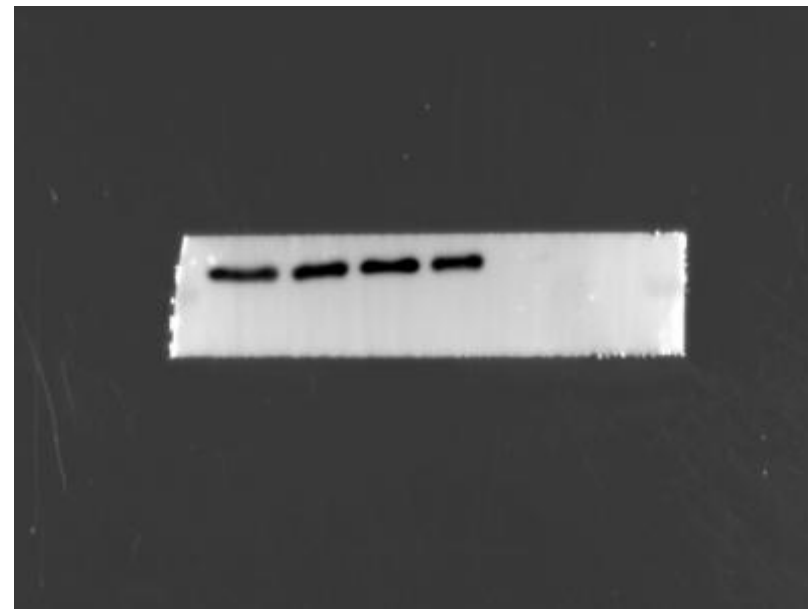

Supplement: MOESM2 [file 26610280]
